# Supplementary material for: Engineering core–shell chromium nanozymes with inflammation-suppressing, ROS-scavenging and antibacterial properties for pulpitis treatment
Source: Royal Society of Chemistry journal article supplement (doi:10.1039/d3nr02930a), 2023-01-01
Supplement: d3nr02930a1.pdf [file d3nr02930a1.pdf]

## Supporting Information

### Engineering core-shell chromium nanozymes with inflammation-suppressing, ROS-scavenging and antibacterial properties for pulpitis treatment

#### Supplementary Figures

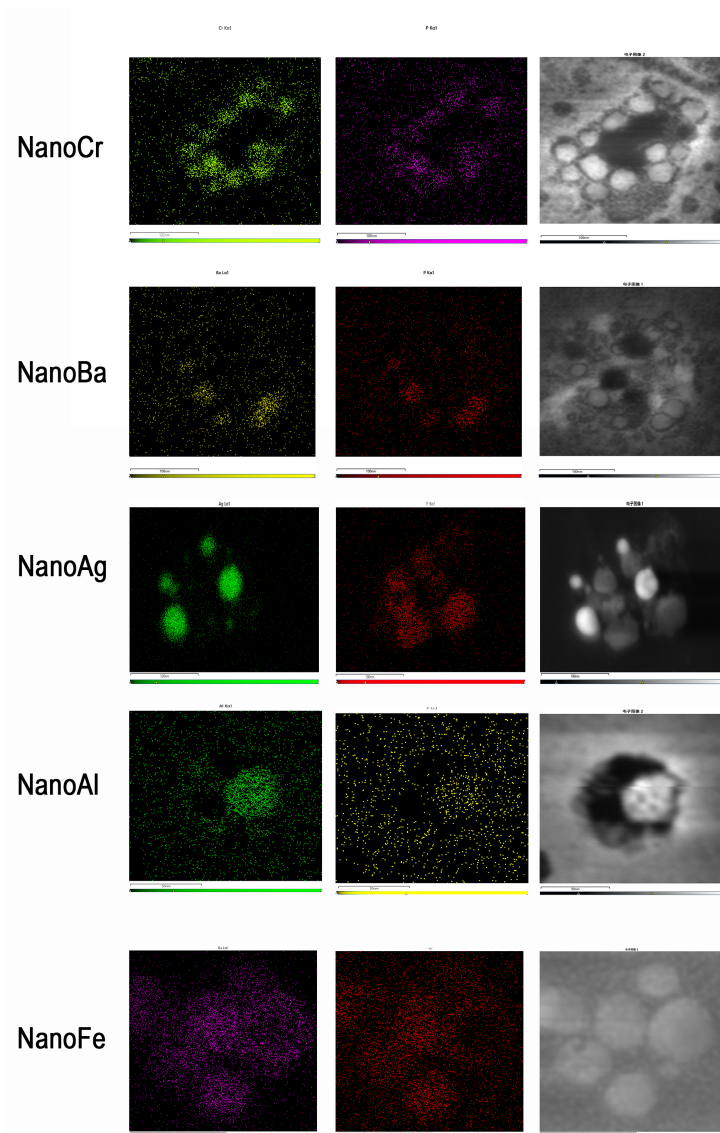

Figure S1: TEM-EDS images of metal nanoparticles.

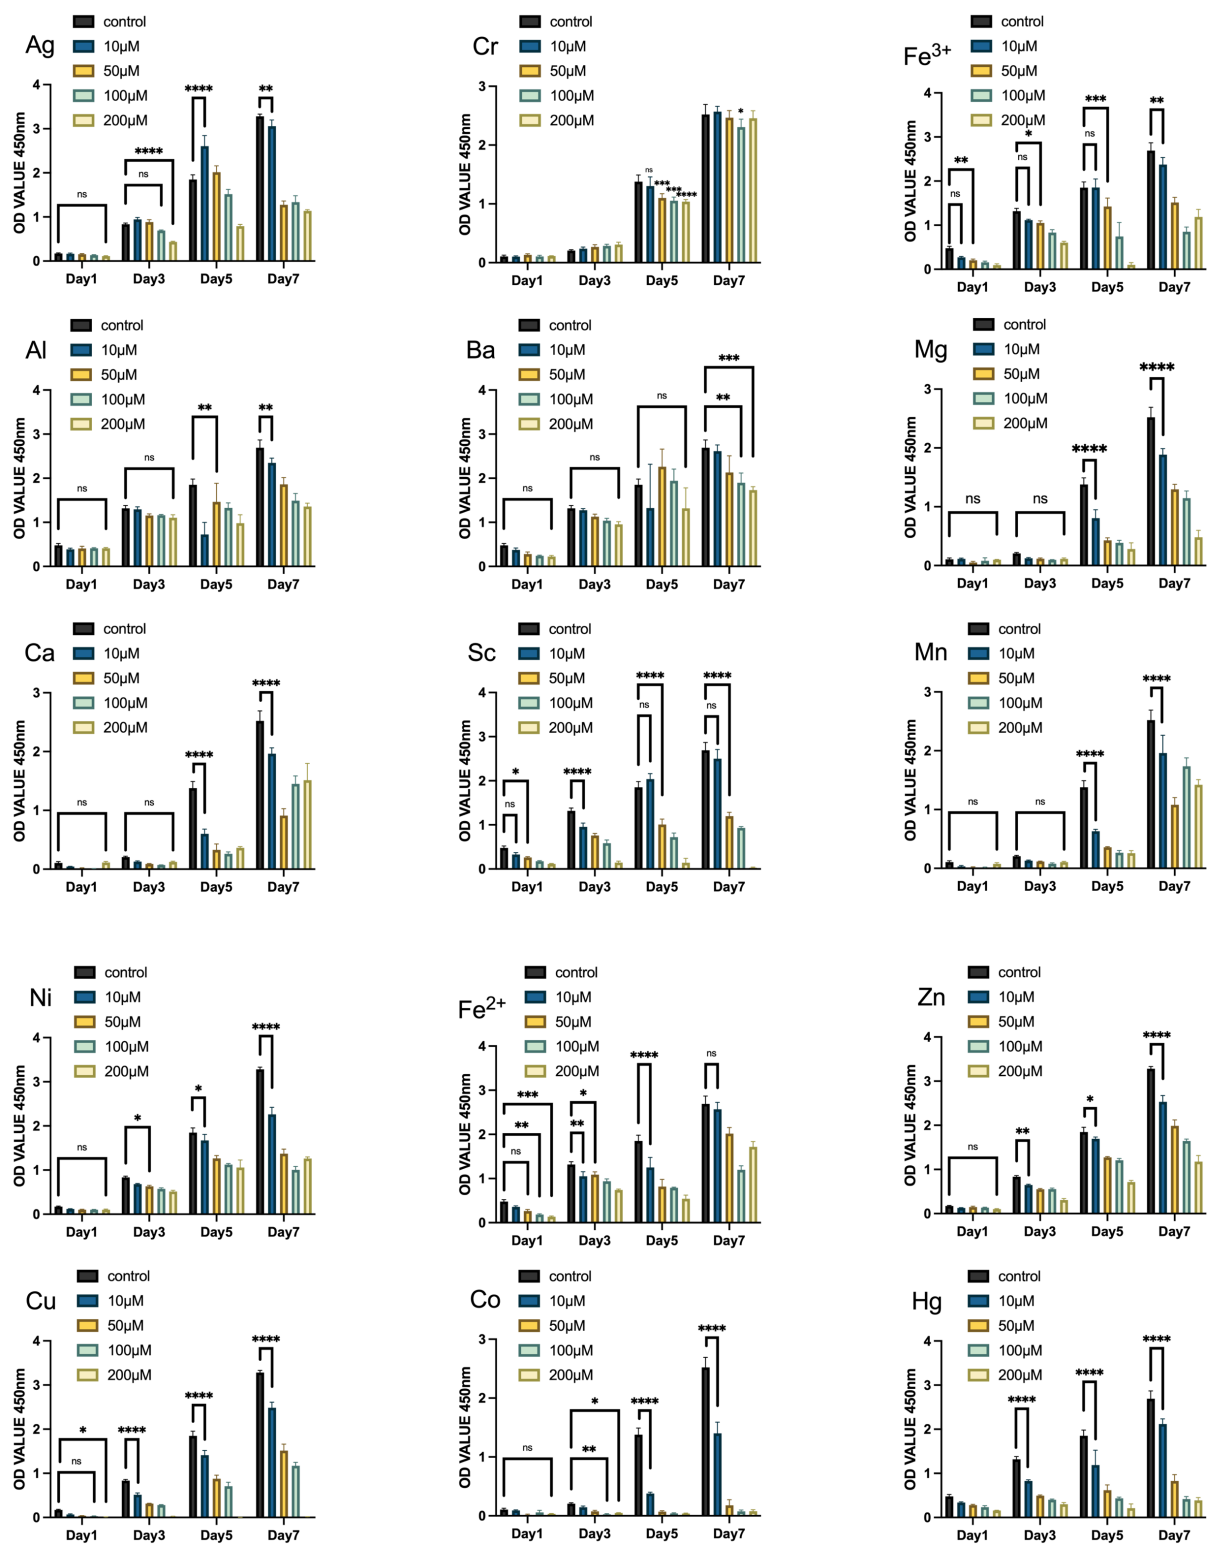

Figure S2: Influence of 15 kinds of metal nanoparticles on the proliferation of DPSCs (n=3/group). Detail values of CCK8 assay on days 1, 3, 5 and 7.

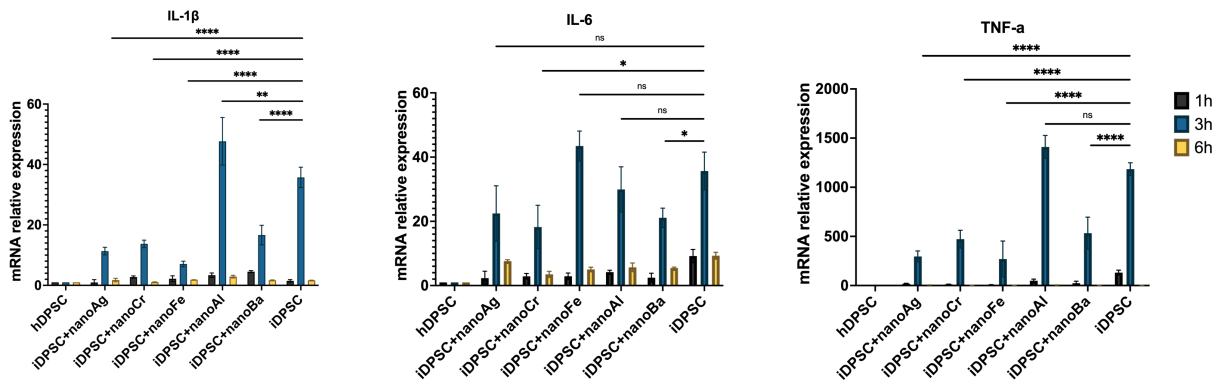

Figure S3: Detail values the expression of inflammatory cytokines (IL-1 $\beta$ , IL-6 and TNF- $\alpha$ ) in DPSCs after treatment with nanoparticles for 1, 3 and 6 hours.

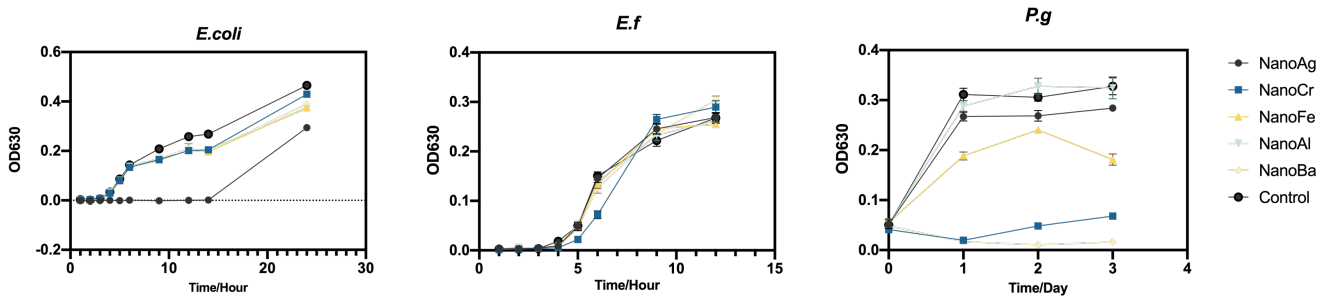

Figure S4: Growth curve of *E. coli*, *E.f* and *P. gingivalis* treated with different nanoparticles.

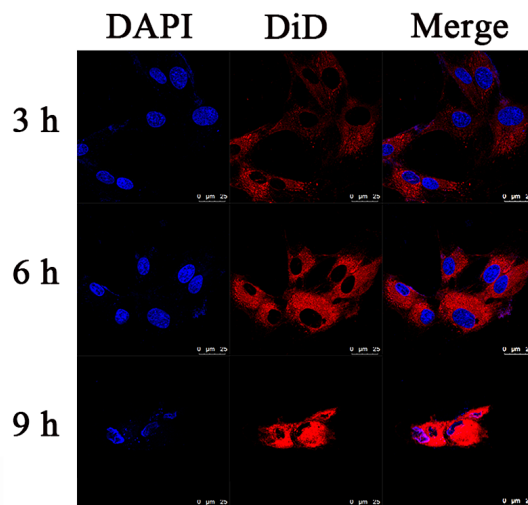

Figure S5: Cellular uptake assay of NanoCr at 3h, 6h and 9h.

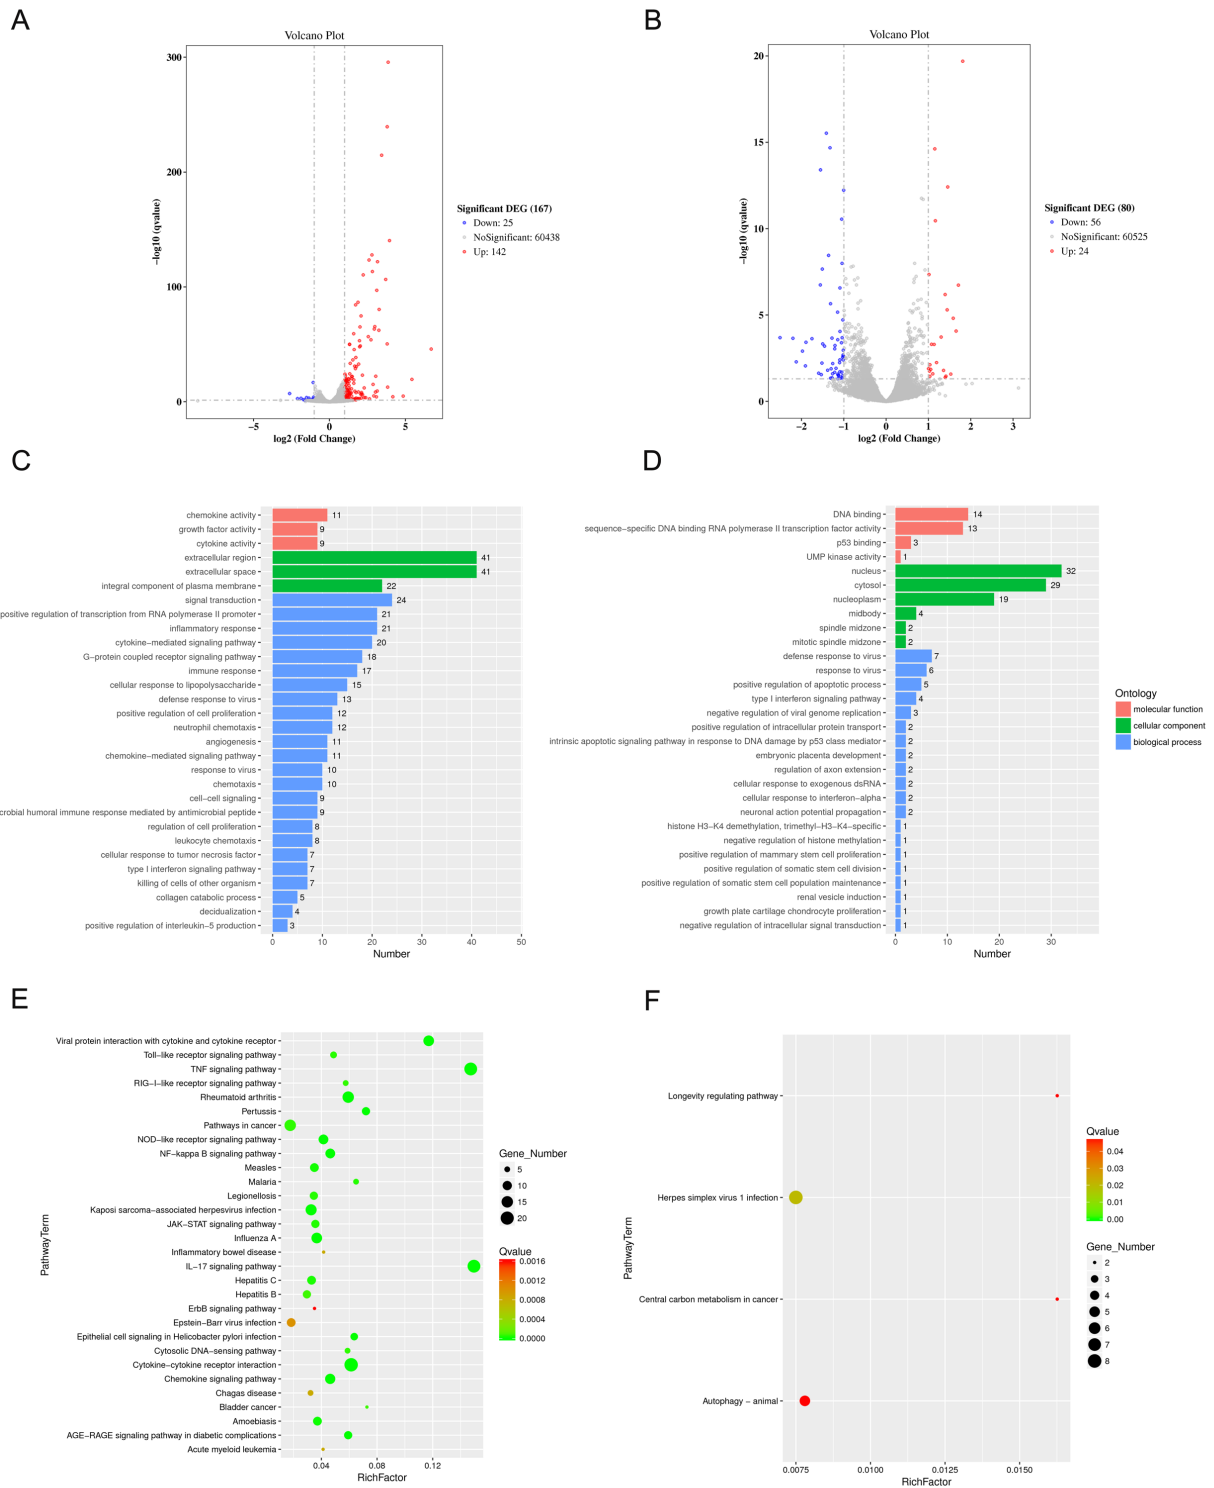

Figure S6: mRNA sequencing of DPSCs. Volcano map of genes that were significantly upregulated (red dots), downregulated (blue) and no significantly changed (gray): (hDPSCs vs. iDPSCs: (A) and iDPSCs vs. iDPSCs treated with NanoCr(B)). GO term enrichment of DEGs: (hDPSCs vs. iDPSCs: (C) and iDPSCs vs. iDPSCs treated with NanoCr(D)). KEGG pathway enrichment analysis of DEGs: (hDPSCs vs. iDPSCs: (E) and iDPSCs vs. iDPSCs treated with NanoCr(F)).

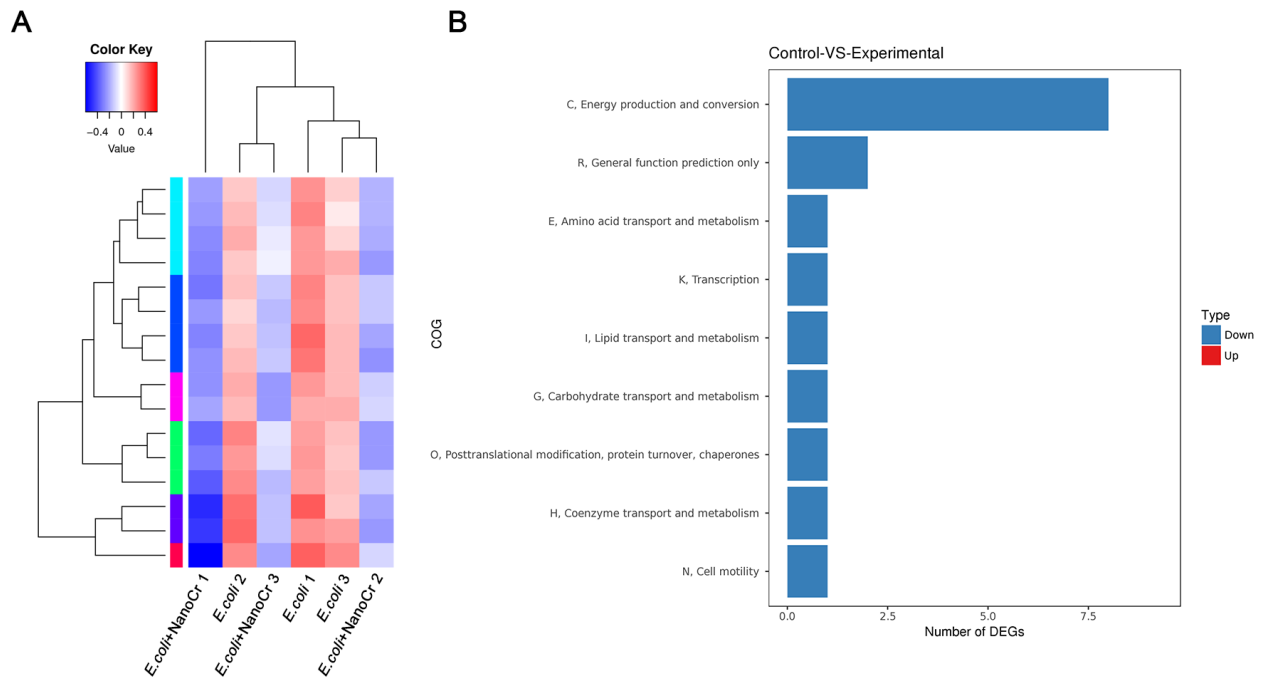

Figure S7: Transcriptome sequencing of *E. coli*. Clustered heatmap of differentially expressed genes depicting the up (red) and downregulated (blue) genes in *E. coli* treated with and without NanoCr (A). Cluster of orthologous groups (COG) distribution map of differentially expressed genes in *E. coli* treated with and without NanoCr (B).

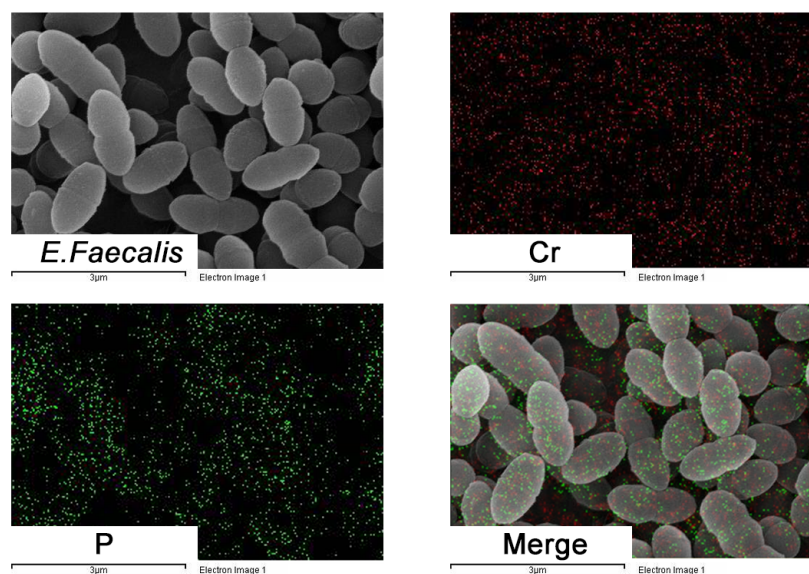

Figure S8: SEM-EDS elemental mapping of *E. faecalis*.

## Supplementary Tables

**Table S1.** Primer sequences designed for the genes detected in reverse transcription (RT)-PCR

| Gene symbol   | Forward primer (5'-3') | Reverse primer (5'-3') |
|---------------|------------------------|------------------------|
| IL-1 $\beta$  | TGCACGATGCACCTGTACGA   | AGGCCCAAGGCCACAGGTAT   |
| IL-6          | ACGAACTCCTTCTCCACAAGC  | CTACATTTGCCGAAGAGCCC   |
| TNF- $\alpha$ | CAGAGGGAAGAGTTCCCCAG   | CCTCAGCTTGAGGGTTTGCTAC |
| GAPDH         | GCAAATTCATGGCACCCTC    | GGGGTCATTGATGGCAACAATA |
